# Supplementary material for: Past and Present of Electrochemical Sensors and Methods for Amphenicol Antibiotic Analysis
Source: MDPI journal article supplement (doi:10.3390/mi13050677), 2022-04-27
Supplement: s1 [file s1]

# Past and Present of Electrochemical Sensors and Methods for Amphenicol Antibiotic Analysis

Iulia Gabriela David \*, Mihaela Buleandra, Dana Elena Popa, Mihaela Carmen Cheregi \*  
and Emilia Elena Iorgulescu

Department of Analytical Chemistry, Faculty of Chemistry, University of Bucharest, Panduri  
Av. 90-92,  
District 5, 050663 Bucharest, Romania; mihaela.buleandra@g.unibuc.ro (M.B.);  
elena.popa@chimie.unibuc.ro (D.E.P.); emilia-elena.iorgulescu@chimie.unibuc.ro (E.E.I.)  
\* Correspondence: gabrielaiulia.david@g.unibuc.ro (I.G.D.); mihaela.cheregi@g.unibuc.ro  
(M.C.C.)

**Table S1.** The recoveries obtained for amphenicol from common food samples.

| Electrode                                   | Mean recovery (%) |        |                     |        |           |             | Ref.        |
|---------------------------------------------|-------------------|--------|---------------------|--------|-----------|-------------|-------------|
|                                             | Milk              |        | Honey               | Eggs   | Tap water | Apple juice | Ice cream   |
|                                             | fresh             | powder |                     |        |           |             |             |
| CAP                                         |                   |        |                     |        |           |             |             |
| MoS <sub>2</sub> /f-MWCNTs/GCE              | 97.35             | 96.05  | 96.60               |        |           |             | [81]        |
| AuNPs/C <sub>3</sub> N <sub>4</sub> /G/GCE  | 96.60             |        |                     |        |           |             | [70]        |
| β -CD/CMK-3@PDA/GCE                         |                   | 96.20  | Bee pollen<br>85.33 |        |           |             | [93]        |
| rGO@NHS@AuNFlos/SPE                         | 95.60             |        | 101.30              | 103.30 |           |             | [107]       |
| Z-800/rGO/GCE                               | 103.70            |        | 100.65              |        |           |             | [56]        |
| EPC/GCE                                     |                   |        | 102.00              |        |           |             | [51]        |
| MIL-101(Cr)/XC-72/GCE                       | 98.50             |        | 98.00               |        |           |             | [85]        |
| MIP(MAA)/3D_CNTs@CuNPs/GCE                  | 94.16             |        |                     |        |           |             | [74]        |
| Co <sub>3</sub> O <sub>4</sub> @rGO/GCE     | 97.90             | 97.90  | 97.77               |        |           |             | [58]        |
| rGO/Cu <sub>2</sub> S NS/SPCE               | 98.77             | 98.80  |                     |        |           |             | 98.23 [106] |
| G/CuPc/GCE                                  | 98.03             |        |                     |        |           |             | [62]        |
| CoMoO <sub>4</sub> /GCE                     | 98.32             |        |                     |        |           |             | [59]        |
| Mn <sub>2</sub> O <sub>3</sub> TNSs/ SPCE   | 96.75             |        |                     |        |           |             | [110]       |
| Bi <sub>2</sub> S <sub>3</sub> @GCN/SPCE    | 99.39             |        | 99.33               |        |           |             | [113]       |
| Apt-MIP(Res)/AgNPs/3-ampy-rGO/GCE           | 100.50            |        |                     |        |           |             | [99]        |
| rGO/PdNPs/GCE                               |                   |        | 93.00               |        | 106.60    |             | [67]        |
| GO/ZnO/GCE                                  | 94.41             |        | 99.33               |        |           |             | [65]        |
| Eu <sub>2</sub> O <sub>3</sub> NPs@rGO/SPCE | 98.24             |        | 98.48               |        |           |             | [111]       |
| Sr-ZnO@rGO/SPCE                             | 99.03             | 98.12  |                     |        |           |             | [112]       |
| MIO@NG/MSPE                                 | 100.15            | 100.8  |                     |        |           |             | [115]       |
| MoN@S-GCN/GCE                               |                   | 98.75  |                     |        |           |             | [81]        |
| Cl-rGO/GCE                                  | 102.95            |        |                     |        | 102.15    |             | [55]        |
| PDA-VGCF/GCE                                | 99.36             |        | 97.84               |        |           | 98.28       | [94]        |
| NiCo <sub>2</sub> O <sub>4</sub> @C/GCE     | 100.97            |        | 99.52               |        |           |             | [60]        |

|                    |       |        |       |
|--------------------|-------|--------|-------|
| ENC-800/GCE        | 98.33 | 100.33 | [52]  |
| <b>FF</b>          |       |        |       |
| G/CuPc/GCE         | 98.60 |        | [61]  |
| <b>TAP</b>         |       |        |       |
| CNTs/en/AuNPs/SPCE | 99.95 |        | [118] |
